# Supplementary material for: Charting the known chemical space for non-aqueous lithium–air battery electrolyte solvents
Source: Royal Society of Chemistry journal article supplement (doi:10.1039/c5cp02937f), 2015-01-01
Supplement: c5cp02937f1.pdf [file c5cp02937f1.pdf]

Supporting Information for

# Charting the known chemical space for non-aqueous Lithium-air battery electrolyte solvents

Tamara Husch<sup>1</sup> and Martin Korth<sup>1\*</sup>

<sup>1</sup> Institute for Theoretical Chemistry, Ulm University, Albert-Einstein-Allee 11, 89069 Ulm (Germany)

\* Corresponding author e-mail: martin.korth@uni-ulm.de

## Contents:

1. Comparison of donor number and chemical potential of  $Li^+$
2. Further methodological considerations
3. Evaluation of COSMOtherm  $pK_a$  predictions
4. Results for evaluation strategy 1
5. Results for evaluation strategy 2
6. Results for evaluation strategy 3
7. Analysis of compound class performance
8. Phosphine oxide screening results
9. Heterocycles screening results
10. Final results
11. Alternative results

## 1. Comparison of donor numbers and chemical potential of $Li^+$

Johnson *et al.* as well as Aetukuri *et al.* proposed the donor number (DN) for the classification of Li-air battery electrolyte solvents in terms of their  $Li^+$  solubility.[1, 2] COSMOtherm allows to compute the chemical potential of ions in bulk liquids, so that we do not have to rely on acceptor and DN, which apart from likely being less accurate are not readily available for large scale computational screenings. (For more details on the performance of COSMOtherm see section 2.) The chemical potential was calculated with COSMOtherm on top of BP86/TZVP-DFT calculations to compare the DN to the chemical potential of  $Li^+$ . The results can be seen in table 1.

Table 1: Comparison of experimentally derived donor numbers and the calculated chemical potential for  $Li^+$  in the listed compound.

| Molecule     | DN   | $\mu(Li^+)kcal/mol$ |
|--------------|------|---------------------|
| Acetonitrile | 14.0 | 17.5                |
| BN           | 11.9 | 19.0                |
| DMC          | 17.2 | 17.9                |
| DME          | 20.0 | 17.1                |
| DMSO         | 30.0 | 9.3                 |
| EC           | 16.4 | 17.2                |
| GBL          | 18.0 | 15.6                |
| Me-Im        | 47.0 | 10.0                |
| MeOAc        | 16.3 | 16.3                |
| NMP          | 27.3 | 10.4                |
| PC           | 15.1 | 17.2                |
| SFL          | 14.8 | 15.4                |
| TMP          | 23.0 | 15.3                |

Perusing this table we find a high correlation ( $R=0.85$ ) between DN and  $\mu(Li^+)$ . COSMOtherm thus reproduces the trend that solvents with a higher DN are better at solving  $Li^+$ . We also find the nearly linear dependence in a DN-Range from 10-25 as reported by Aetukuri *et al.*[2] The experimental finding is that for higher DN a saturation of the  $Li^+$  solubility is observed and increased DN do not lead to better  $Li^+$  solubility. This behavior is more correctly captured by  $\mu(Li^+)$ , which should therefore be more valuable for our purpose. As an alternative we also evaluated explicit  $Li^+$  solvation energies at various theoretical levels by automatically constructing  $Li^+$ /solvent clusters for each candidate compound (including bulk solvation implicitly via COSMO), but correlation with DN and experiment was less good than for COSMOtherm chemical potentials (which unlike the cluster calculations include the correct statistical thermodynamics of the liquid

phase).

The chemical potential in COSMO-RS theory (as computed by COSMOtherm) is therefore a very central quantity for our purpose, which is why further details are given for the information of the reader not familiar with the basics of COSMO-RS theory: COSMO-RS theory is based on the assumption of (independently) interacting molecular surface charges. It combines a QM-level electrostatic description of interacting molecules with the statistical thermodynamics of the liquid phase. The chemical potential for a compound in a system is derived from the integration of the  $\sigma$ -potential over the surface of the compound. The  $\sigma$ -potential measures the affinity of the system to a surface of a certain polarity, and can be derived from a QM calculation with the COSMO implicit solvation model. COSMO-RS predictions thus make use of data from electronic structure theory calculations to allow for the description also of hitherto experimentally unknown species, which makes this approach superior to chemical engineering models for our purpose.

## 2. Further methodological considerations

Our multi-level screening strategy is based on the assumption that properties are treated acceptably well for pre-screening purposes already at lower theoretical levels. To evaluate this, we look at correlation values and deviation statistics between the predictions at different theoretical levels. Mean deviations (MDs) are a measure for how much values are shifted between methods on average, low mean average deviations (MADs) indicate similar absolute values, High Pearson R values indicate similar trends between methods. This analysis is sometimes swamped by a small number of compounds for which the methods to compare give completely different values, in some cases a reasonable and a totally unrealistic one. We have therefore calculated MD, MAD and R values after excluding such cases, also giving the percentage of compounds for which this was necessary, as well as the uncorrected values in parenthesis.

Perusing table 2, the following conclusions can be drawn: We use COSMOfrag for a very quick pre-screening with respect to the viscosity of candidate compounds. R, MD and MAD values in comparison to SQM predictions are 0.60, -0.5 cP and 1.24 cP. This seems acceptable given the fact that we use a much higher cutoff value of 10cP to select compounds at the COSMOfrag stage in comparison to 5cP at the SQM and 3cP at the DFT stages. We use SQM single points to pre-

Table 2: Correlations (Pearson R values) and deviation statistics (mean and mean absolute deviations, MD and MAD) for predictions at different theoretical levels.

|                                        | R          | MD           | MAD        | exclusions |
|----------------------------------------|------------|--------------|------------|------------|
| COSMOfrag vs SQM                       |            |              |            |            |
| $\eta/cP$                              | 0.60(0.37) | -0.50(-0.81) | 1.24(1.74) | 20.6%      |
| SQM single points vs SQM optimizations |            |              |            |            |
| $\mu(Li+)/(\text{kcal/mol})$           | 0.82       | -0.17        | 0.95       | 0          |
| SQM vs DFT                             |            |              |            |            |
| $\eta/cP$                              | 0.71(0.51) | 0.17(0.28)   | 0.73(0.85) | 2.3%       |
| $T_f/K$                                | 0.83       | -13.50       | 15.75      | 0          |
| $\mu(Li+)/(\text{kcal/mol})$           | 0.60(0.39) | 2.99(3.85)   | 3.09(3.95) | 17.4%      |
| $\mu(O_2-)/(\text{kcal/mol})$          | 0.84       | -0.02        | 0.97       | 0          |

screen compounds with respect to the chemical potential for  $Li^+$ . Compared to SQM optimizations a high R value ( $>0.8$ ) and a low MAD is found ( $<10\%$ ), justifying this strategy. We use SQM-based property predictions to reduce the number of much more costly DFT calculations. The corresponding comparison of predicted values gives comparably high R values and acceptable MAD values, in the cases of  $\eta$  and  $\mu(Li^+)$  with some outliers. The positive MDs for  $\eta$  and  $\mu(Li^+)$  indicate an underestimation of these properties by SQM, in a rather pronounced way in the case of  $\mu(Li^+)$ , but this is not harmful for our purpose of pre-screening compounds, as it only leads to false-positives, which are excluded at the higher level of theory.

COSMOtherm itself has known accuracy limitations for small ions, polar aprotic solvents and secondary and tertiary amines. Fortunately, trends for chemical potentials of a given small ion in a series of solvents are far less afflicted, and the performance for the combination of polar aprotic solvents and symmetric polar solutes like  $Li^+$  and  $O_2^-$  is fine, as is the performance for secondary and tertiary amine solvents if only aprotic cases (without H-bonding effects) are investigated.[3]

### 3. Evaluation of COSMOtherm $pK_a$ predictions

To evaluate the performance of  $pK_a$ -calculations with COSMOtherm, we compared our results to data from Bryantsev.[4] The results can be seen in figure 1. Bryantsev evaluated  $pK_a$  values in DMSO at MP2/CBS+ $\delta$ CCSD(T) level with an empirically adjusted SVPE2 solvent model and used the proton free energy of solvation as a parameter. He picked the most acidic protons based on chemical intuition, while we calculate  $pK_a$  values for every hydrogen atom in a molecule, giving

relevance only to the lowest value. After proton abstraction, anions are re-optimized at BP86/TZVP level. The  $pK_a$  is then calculated using COSMOtherm with DMSO as solvent. Not all structures are stable in the charged state and undergo severe structural changes. If the structure changes significantly, this is indicated by a "-" in the column "stable charged structure". In our screening protocol, we take this as an indication of instability in an electrochemical setting.

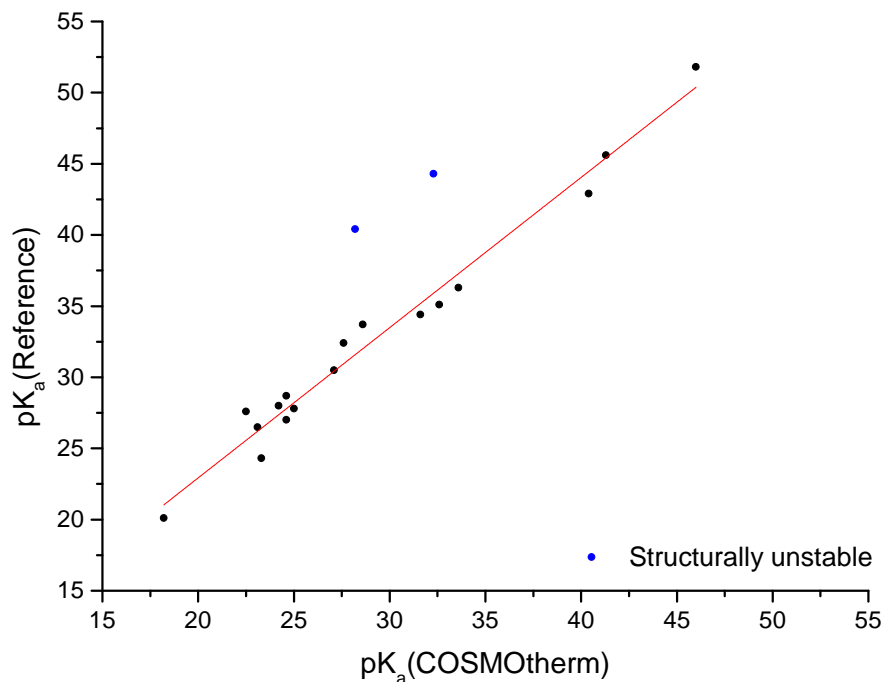

Figure 1: Comparison of calculated  $pK_a$  values with theoretical reference data from Ref.[4]

After excluding cases with significant structural changes (indicated in blue), we observe a very high correlation ( $R=0.99$ ) for the comparison of COSMOtherm with higher-level computations. COSMOtherm  $pK_a$ s are systematically shifted by 3.44 ( $MD=3.44$ ,  $MAD=3.44$ ). After adjusting this shift, the MAD is 1.05. Bryantsev empirically adjusted the solvation energy of the proton to improve agreement with experimental data. The COSMOtherm approach offers the advantage that no ad-hoc fitting is necessary. The observed high correlation with reference data furthermore shows the good predictive power of COSMOtherm, which is computationally inexpensive and suitable for high-throughput computations. The systematic shift can easily be taken into account by adjusting the cutoff-value for sorting out unstable structures. Bryantsev proposed a  $pK_a$  less than 35 as a criteria for unstable compounds, in our approach we are using 25. Similarly, the direct comparison with our reference compounds (DMSO, MeIm) is unproblematic.

Bryantsev *et al.* developed a protocol to predict the resistance of Li-air battery electrolyte solvents against nucleophilic attacks by the superoxide anion radical.[5] Later on Bryantsev as well as Khetan *et al.* proposed the  $pK_a$  as an estimator for this property, in addition to activation barriers for the nucleophilic attack  $\Delta G_{act} \geq 25$ . [4, 6, 7, 8] The computation of the explicit nucleophilic reaction barriers is not yet feasible for large-scale high-throughput calculation, but in table 3, we show that  $pK_a$  values are a reasonable first estimate for the stability against nucleophilic attacks, as measured by  $\Delta G_{act}$ .

Perusing table 3, we observe that structural changes only occur for compounds which are predicted to be unstable against nucleophilic attacks. For all cases in which the activation energy is predicted to be higher than 25 kcal/mol, the  $pK_a$  is predicted as higher than 25. For cases that are predicted to be unstable against nucleophilic attacks, the  $pK_a$  is not a sufficient criteria. An example in this data set is DMC, which is predicted to be very susceptible to nucleophilic attacks, but has a  $pK_a$  of 42. From this we can conclude that compounds with a computed  $pK_a$  below 25 are likely to not stable in the setting of a Li-air battery. If the  $pK_a$  is high, this is an indication of stability, but has to be taken with care. We recommend a detailed investigation of final candidates that goes beyond the simple descriptor of  $pK_a$ , for example by following the suggestions of Bryantsev *et al.*. [5]

Table 3: Comparison of  $pK_a$  and  $\Delta G$  values.

| Compound     | $\Delta G_{act}[\text{kcal/mol}]^*$ | $\Delta G_r[\text{kcal/mol}]^*$ | $pK_a$ | stable charged structure |
|--------------|-------------------------------------|---------------------------------|--------|--------------------------|
| 4,4-diF-GBL  | 27.41                               | -1.01                           | 14,45  | -                        |
| 4,4-diMe-GBL | 20.16                               | -1.15                           | 18,02  | -                        |
| Acetonitrile | 24.92                               | 18.96                           | 27,45  |                          |
| BN           | 25.31                               | 21.57                           | 37,71  |                          |
| DMC          | 12.42                               | -11.39                          | 42,40  |                          |
| DME          | 31.56                               | 19.88                           | 45,46  |                          |
| DMMP         | 12.37                               | -10.45                          | 29,55  |                          |
| EC           | 14.22                               | -6.94                           | 10,26  | -                        |
| EMS          | 22.79                               | 2.79                            | 18,66  | -                        |
| GBL          | 16.52                               | -4.99                           | 15,65  | -                        |
| GVL          | 18.26                               | -3.84                           | 17,10  | -                        |
| MDMP         | 17.63                               | -6.55                           | 31,93  |                          |
| MeOAc        | 19.25                               | -1.30                           | 27,27  |                          |
| Me-Tos       | 10.17                               | -19.06                          | 7,62   | -                        |
| NMP          | 40.18                               | 25.59                           | 32,28  |                          |
| PC           | 15.47                               | -5.64                           | 10,77  | -                        |
| PhB          | 14.45                               | 0.91                            | 38,78  |                          |
| SFL          | 20.19                               | -2.98                           | 15,43  | -                        |
| TMP          | 12.55                               | -13.59                          | 42,37  |                          |

(\* Obtained from ref.[5])

#### 4. Results for evaluation strategy 1

Table 4 presents the results for the first evaluation strategy, in which Pareto-optimal candidates from the whole final data set are picked. QSPR-estimated melting points are given as a first indication of whether compounds are liquid at room temperature, but the mean accuracy of these estimates is low and this data should thus be taken with care, especially if COSMOtherm predicts low viscosities.

Table 4: Strategy 1 - un-filtered Pareto-optimal candidates.

| ID                      | IP[eV] | Visc[cP] | FP[K]  | $\mu(Li^+)$<br>[kcal/mol] | $\mu(O_2^-)$<br>[kcal/mol] | $\mu(O_2)$<br>[kcal/mol] | MP[°C] | $pK_a$ | Pic                                                                                   |
|-------------------------|--------|----------|--------|---------------------------|----------------------------|--------------------------|--------|--------|---------------------------------------------------------------------------------------|
| 00125001_00150000_13066 | 5.94   | 3.31     | 396.10 | 4.17                      | 15.59                      | -2.17                    | 37.3   | 26.49  | 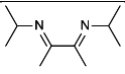 |
| 59700001_59725000_1543  | 5.65   | 2.07     | 335.96 | 4.65                      | 17.87                      | -2.19                    | 46.4   | 49.56  |  |
| 20125001_20150000_6024  | 5.38   | 1.96     | 350.15 | 4.93                      | 15.17                      | -2.13                    | 68.5   | 34.45  |  |

Table 4: Strategy 1 - un-filtered Pareto-optimal candidates.

| ID                      | IP[eV] | Visc[cP] | FP[K]  | $\mu(Li^+)$<br>[kcal/mol] | $\mu(O_2^-)$<br>[kcal/mol] | $\mu(O_2)$<br>[kcal/mol] | MP[°C] | pK <sub>a</sub> | Pic |
|-------------------------|--------|----------|--------|---------------------------|----------------------------|--------------------------|--------|-----------------|-----|
| 00500001_00525000_13753 | 6.92   | 1.79     | 349.89 | 5.44                      | 12.63                      | -1.78                    | 24.1   | 34.79           |     |
| 54500001_54525000_13165 | 5.67   | 2.76     | 353.65 | 5.69                      | 17.86                      | -2.20                    | 105.7  | 49.34           |     |
| 54500001_54525000_8047  | 5.67   | 3.08     | 358.98 | 6.19                      | 17.99                      | -2.19                    | 113.4  | 49.73           |     |
| 00050001_00075000_16265 | 5.25   | 2.04     | 376.95 | 6.38                      | 14.23                      | -2.03                    | 69.3   | 37.25           |     |
| 12675001_12700000_3024  | 5.08   | 2.93     | 352.71 | 6.56                      | 16.54                      | -2.17                    | 47.1   | 48.69           |     |
| 57000001_57025000_14211 | 5.34   | 3.47     | 383.37 | 6.75                      | 15.53                      | -2.18                    | 23.6   | 40.21           |     |
| 00525001_00550000_7313  | 6.18   | 2.88     | 406.61 | 6.86                      | 13.50                      | -1.76                    | 13.3   | 26.37           |     |
| 58700001_58725000_15219 | 5.76   | 2.66     | 384.94 | 7.17                      | 13.71                      | -2.05                    | 38.9   | 38.90           |     |
| 68175001_68200000_8242  | 6.63   | 2.86     | 370.29 | 7.24                      | 13.33                      | -1.79                    | -19.9  | 31.41           |     |
| 12200001_12225000_3956  | 6.18   | 2.41     | 399.77 | 7.29                      | 13.89                      | -1.78                    | 10.7   | 29.28           |     |
| 58250001_58275000_10259 | 6.38   | 1.75     | 334.85 | 7.34                      | 15.79                      | -2.16                    | 4.2    | 16.20           |     |
| 68250001_68275000_15315 | 6.02   | 2.19     | 349.74 | 7.41                      | 17.03                      | -2.23                    | 26.2   | 32.16           |     |
| 69175001_69200000_7354  | 5.25   | 1.16     | 311.26 | 7.43                      | 16.68                      | -1.97                    | -4.8   | 34.98           |     |
| 10025001_10050000_6291  | 6.29   | 3.72     | 410.94 | 7.69                      | 10.31                      | -1.62                    |        | 40.69           |     |
| 11750001_11775000_12592 | 5.35   | 3.75     | 402.42 | 7.69                      | 12.59                      | -1.94                    | 72.7   | 33.18           |     |
| 00125001_00150000_10034 | 6.18   | 1.29     | 352.12 | 7.98                      | 12.51                      | -1.68                    | -30.2  | 27.48           |     |
| 59125001_59150000_664   | 5.47   | 1.69     | 325.78 | 8.00                      | 17.89                      | -2.20                    | 63.4   | 45.70           |     |
| 67675001_67700000_5104  | 5.09   | 2.68     | 381.24 | 8.08                      | 15.94                      | -2.18                    | 52.2   | 24.48           |     |
| 00125001_00150000_11962 | 5.23   | 2.71     | 372.12 | 8.20                      | 16.39                      | -1.99                    | 10.9   | 20.31           |     |
| 59075001_59100000_9892  | 6.49   | 1.92     | 356.20 | 8.21                      | 15.15                      | -2.01                    | -15.7  | 29.71           |     |



Table 4: Strategy 1 - un-filtered Pareto-optimal candidates.

| ID                      | IP[eV] | Visc[cP] | FP[K]  | $\mu(Li^+)$<br>[kcal/mol] | $\mu(O_2^-)$<br>[kcal/mol] | $\mu(O_2)$<br>[kcal/mol] | MP[°C] | pK <sub>a</sub> | Pic                                                                                   |
|-------------------------|--------|----------|--------|---------------------------|----------------------------|--------------------------|--------|-----------------|---------------------------------------------------------------------------------------|
| 00000001_00025000_12645 | 6.09   | 1.38     | 367.16 | 8.24                      | 14.80                      | -1.85                    | -0.5   | 26.96           |    |
| 21950001_21975000_9158  | 4.91   | 1.74     | 332.63 | 8.42                      | 19.20                      | -2.22                    | -40.2  | 49.03           |    |
| 00150001_00175000_6040  | 6.34   | 1.89     | 373.60 | 8.47                      | 15.21                      | -1.87                    | 30.3   | 33.06           |    |
| 00000001_00025000_516   | 6.29   | 1.24     | 343.99 | 8.50                      | 9.12                       | -1.46                    | -45.2  | 32.88           |    |
| 20400001_20425000_1834  | 5.84   | 2.96     | 363.49 | 8.52                      | 16.41                      | -2.19                    | 48.3   | 35.03           |    |
| 54275001_54300000_4110  | 6.23   | 2.32     | 387.22 | 8.61                      | 15.76                      | -1.94                    | 27.1   | 33.87           |    |
| 20050001_20075000_12073 | 5.81   | 1.92     | 375.41 | 8.67                      | 16.64                      | -2.01                    | 22.4   | 44.73           |    |
| 18750001_18775000_3561  | 5.02   | 3.41     | 397.13 | 8.69                      | 14.16                      | -2.06                    | 92.0   | 2.96            |    |
| 19825001_19850000_12260 | 5.32   | 3.62     | 374.74 | 8.70                      | 17.10                      | -2.10                    | 57.0   | 47.83           |   |
| 54300001_54325000_8631  | 6.05   | 5.02     | 401.80 | 8.81                      | 12.84                      | -2.04                    | 30.6   | 32.28           |  |
| 68150001_68175000_1461  | 6.04   | 2.77     | 400.51 | 8.83                      | 15.86                      | -2.00                    |        | 26.15           |  |
| 00000001_00025000_9770  | 6.32   | 1.05     | 338.47 | 8.85                      | 14.93                      | -1.83                    | -44.8  | 32.68           |  |
| 18300001_18325000_5273  | 5.18   | 3.88     | 416.13 | 8.93                      | 14.93                      | -1.95                    | 57.3   | 26.49           |  |
| 58350001_58375000_10825 | 6.27   | 3.44     | 407.00 | 8.97                      | 16.56                      | -2.04                    | 42.2   | 33.67           |  |

## 5. Results for evaluation strategy 2

For table 5, Pareto-optimal candidates are picked after filtering out structures with one or more property much worse than DMSO and Melm. Filter thresholds were:  $IP \leq 6.0$  eV,  $Visc \leq 3.0$  cP,  $FP \geq 323.0$  K,  $\mu(Li^+) \leq 9.0$  kcal/mol,  $\mu(O_2^-) \leq 10.0$  kcal/mol,  $\mu(O_2) \leq -1.0$  kcal/mol). QSPR-estimated melting points are given as a first indication of whether compounds are liquid at room temperature, but the mean accuracy of these estimates is low and this data should thus be

taken with care, especially if COSMOtherm predicts low viscosities.

Table 5: Strategy 2 - filtered Pareto-optimal candidates.

| ID                     | IP[eV] | Visc[cP] | FP[K]  | $\mu(Li^+)$<br>[kcal/mol] | $\mu(O_2^-)$<br>[kcal/mol] | $\mu(O_2)$<br>[kcal/mol] | MP[°C] | pK <sub>a</sub> | Pic                                                                                 |
|------------------------|--------|----------|--------|---------------------------|----------------------------|--------------------------|--------|-----------------|-------------------------------------------------------------------------------------|
| 00000001_00025000_868  | 6.09   | 1.70     | 364.75 | 1.33                      | 9.38                       | -1.82                    |        | 43.01           |  |
| 12600001_12625000_1867 | 6.19   | 2.74     | 399.27 | 8.41                      | 9.65                       | -1.46                    | -16.6  | 25.54           |  |
| 11700001_11725000_294  | 7.31   | 2.01     | 392.91 | 8.43                      | 9.75                       | -1.48                    | -21.7  | 31.99           |  |
| 00000001_00025000_516  | 6.29   | 1.24     | 343.99 | 8.50                      | 9.12                       | -1.46                    | -45.2  | 32.88           |  |
| 00000001_00025000_1057 | 6.05   | 1.51     | 345.23 | 8.84                      | 9.81                       | -1.66                    | 3.4    | 38.24           |  |

## 6. Results for evaluation strategy 3

For table 6, Pareto-optimal candidates are picked after filtering out structures which show significantly worse chemical potentials for  $Li^+$  and  $O_2^-$ . Filter thresholds were the values of Melm +10%, i.e.  $\mu(Li^+) \leq 9.72kcal/mol$ ,  $\mu(O_2^-) \leq 10.79kcal/mol$ . QSPR-estimated melting points are given as a first indication of whether compounds are liquid at room temperature, but the mean accuracy of these estimates is low and this data should thus be taken with care, especially if COSMOtherm predicts low viscosities.

Table 6:  $\mu$ -filtered Pareto-optimal candidates.

| ID                      | IP[eV] | Visc[cP] | FP[K]  | $\mu(Li^+)$<br>[kcal/mol] | $\mu(O_2^-)$<br>[kcal/mol] | $\mu(O_2)$<br>[kcal/mol] | MP[°C] | pK <sub>a</sub> | Pic                                                                                   |
|-------------------------|--------|----------|--------|---------------------------|----------------------------|--------------------------|--------|-----------------|---------------------------------------------------------------------------------------|
| 00550001_00575000_18589 | 6.41   | 2.81     | 449.34 | 7.34                      | 10.59                      | -1.90                    | 89.5   | 34.26           |  |
| 20500001_20525000_7677  | 6.46   | 3.60     | 398.71 | 8.07                      | 10.26                      | -1.49                    | 18.5   | 29.66           |  |
| 12600001_12625000_1867  | 6.19   | 2.74     | 399.27 | 8.41                      | 9.65                       | -1.46                    | -16.6  | 25.54           |  |
| 11700001_11725000_294   | 7.31   | 2.01     | 392.91 | 8.43                      | 9.75                       | -1.48                    | -21.7  | 31.99           |  |
| 12200001_12225000_1705  | 5.38   | 4.56     | 449.08 | 8.46                      | 9.27                       | -1.58                    | 55.2   | 34.02           |  |
| 00000001_00025000_516   | 6.29   | 1.24     | 343.99 | 8.50                      | 9.12                       | -1.46                    | -45.2  | 32.88           |  |

Table 6:  $\mu$ -filtered Pareto-optimal candidates.

| ID                      | IP[eV] | Visc[cP] | FP[K]  | $\mu(Li^+)$<br>[kcal/mol] | $\mu(O_2^-)$<br>[kcal/mol] | $\mu(O_2)$<br>[kcal/mol] | MP[°C] | pK <sub>a</sub> | Pic |
|-------------------------|--------|----------|--------|---------------------------|----------------------------|--------------------------|--------|-----------------|-----|
| 11875001_11900000_14792 | 7.34   | 2.94     | 412.32 | 8.67                      | 10.69                      | -1.47                    | 18.8   | 14.05           |     |
| 20550001_20575000_677   | 6.71   | 5.12     | 450.56 | 8.75                      | 10.21                      | -1.92                    | 75.0   | 34.82           |     |
| 68325001_68350000_3338  | 4.72   | 5.58     | 429.73 | 8.76                      | 10.60                      | -1.86                    | 83.9   | 34.95           |     |
| 12275001_12300000_592   | 7.45   | 4.23     | 446.60 | 8.82                      | 9.27                       | -1.81                    | 69.0   | 33.86           |     |
| 00000001_00025000_1057  | 6.05   | 1.51     | 345.23 | 8.84                      | 9.81                       | -1.66                    | 3.4    | 38.24           |     |
| 18725001_18750000_1413  | 6.71   | 4.83     | 448.98 | 9.07                      | 8.89                       | -1.79                    | 68.0   | 34.95           |     |
| 12200001_12225000_2961  | 6.97   | 3.81     | 445.80 | 9.10                      | 7.92                       | -1.70                    | 70.6   | 33.76           |     |
| 23550001_23575000_15879 | 6.09   | 4.65     | 438.73 | 9.10                      | 9.09                       | -1.40                    | 3.3    | 11.05           |     |
| 10325001_10350000_1650  | 6.82   | 2.89     | 425.12 | 9.21                      | 10.58                      | -1.88                    | 79.8   | 22.25           |     |
| 12725001_12750000_2416  | 6.36   | 2.48     | 386.95 | 9.23                      | 9.95                       | -1.43                    | -21.9  | 26.66           |     |
| 20700001_20725000_15339 | 5.84   | 3.14     | 376.59 | 9.27                      | 9.57                       | -1.70                    | 70.7   | 20.33           |     |
| 69625001_69650000_7810  | 6.33   | 3.90     | 418.83 | 9.28                      | 10.45                      | -1.56                    | 21.8   | 24.76           |     |
| 12275001_12300000_10    | 5.47   | 3.13     | 386.31 | 9.33                      | 9.65                       | -1.64                    | 70.2   | 21.66           |     |
| 00625001_00650000_8861  | 5.61   | 1.82     | 422.65 | 9.42                      | 10.69                      | -1.60                    | -33.3  | 36.15           |     |
| 05250001_05275000_3828  | 7.08   | 5.70     | 440.50 | 9.51                      | 9.25                       | -1.89                    | 80.1   | 22.59           |     |
| 19850001_19875000_11134 | 5.53   | 3.72     | 427.28 | 9.56                      | 10.45                      | -1.58                    | 19.4   | 24.14           |     |
| 20700001_20725000_7948  | 6.80   | 3.51     | 410.19 | 9.57                      | 10.74                      | -1.74                    | 28.3   | -0.22           |     |
| 10875001_10900000_9510  | 6.22   | 2.12     | 371.81 | 9.58                      | 10.22                      | -1.51                    | -44.7  | 24.99           |     |
| 11750001_11775000_12499 | 6.22   | 2.12     | 371.81 | 9.58                      | 10.22                      | -1.51                    | -44.7  | 24.99           |     |
| 13700001_13725000_2503  | 5.39   | 2.66     | 423.05 | 9.62                      | 10.19                      | -1.60                    | 16.5   | 28.84           |     |
| 10975001_11000000_17384 | 5.49   | 3.06     | 393.28 | 9.64                      | 9.75                       | -1.66                    | 71.0   | 20.09           |     |
| 53675001_53700000_11625 | 5.83   | 4.71     | 426.22 | 9.66                      | 9.61                       | -1.71                    | 80.0   | -5.43           |     |
| 15750001_15775000_544   | 6.11   | 4.08     | 398.79 | 9.67                      | 10.76                      | -1.79                    | 35.0   | 7.77            |     |

Table 6:  $\mu$ -filtered Pareto-optimal candidates.

| ID                      | IP[eV] | Visc[cP] | FP[K]  | $\mu(Li^+)$<br>[kcal/mol] | $\mu(O_2^-)$<br>[kcal/mol] | $\mu(O_2)$<br>[kcal/mol] | MP[°C] | pK <sub>a</sub> | Pic                                                                                 |
|-------------------------|--------|----------|--------|---------------------------|----------------------------|--------------------------|--------|-----------------|-------------------------------------------------------------------------------------|
| 68100001_68125000_17906 | 5.52   | 3.24     | 424.10 | 9.68                      | 10.67                      | -1.59                    | 57.1   | 24.75           |  |
| 00125001_00150000_10898 | 6.80   | 5.76     | 443.34 | 9.71                      | 9.43                       | -1.42                    | 14.0   | 35.31           |  |
| 06450001_06475000_2171  | 7.12   | 2.59     | 400.80 | 9.72                      | 10.22                      | -1.43                    | -29.8  | 30.60           |  |

## 7. Analysis of compound class performance

To analyze the average performance of the different compound classes in the PubChem database, functional groups of the whole final set of compounds were determined, and property values were averaged over all members of the same compounds class, defined by a functional group each. Table 7 presents the average value of all compounds that contain the specific functional groups. Compound classes are sorted by the chemical potential of  $Li^+$  and listed if the average  $\mu(Li^+)$  was lower than the Melm value plus 1.

Table 7: Compound class analysis.

| Compound Class*                                           | Pic                                                                                 | IP[eV] | Visc[cP] | FP[K]  | $\mu(Li^+)$<br>[kcal/mol] | $\mu(O_2^-)$<br>[kcal/mol] | $\mu(O_2)$<br>[kcal/mol] | pK <sub>a</sub> |
|-----------------------------------------------------------|-------------------------------------------------------------------------------------|--------|----------|--------|---------------------------|----------------------------|--------------------------|-----------------|
| Phosphine Oxide                                           |    | 6.65   | 2.69     | 387.18 | 5.85                      | 13.43                      | -1.78                    | 33.17           |
| Phosphine                                                 |   | 6.56   | 2.78     | 386.57 | 6.34                      | 13.55                      | -1.80                    | 33.17           |
| Carboxylic Acid<br>Amidine                                |  | 5.34   | 2.52     | 370.88 | 8.13                      | 15.44                      | -2.13                    | 33.42           |
| Secondary<br>Aliphaticaromatic<br>Amine<br>Alkylarylamine | N-Rings                                                                             | -5.43  | 3.96     | 392.81 | 8.91                      | 12.65                      | -1.97                    | 25.61           |
| Guanidine                                                 |  | 5.16   | 1.99     | 373.97 | 9.16                      | 16.32                      | -2.17                    | 42.27           |
| Sulfoxide                                                 |  | 6.14   | 2.68     | 387.80 | 9.41                      | 12.82                      | -1.74                    | 26.25           |
| Hydroxamic Acid                                           |  | 5.69   | 2.89     | 390.50 | 9.44                      | 8.41                       | -1.28                    | -12.05          |
| Isothiourea                                               |  | 5.26   | 2.97     | 405.83 | 9.53                      | 13.98                      | -2.02                    | 36.61           |
| Semicarbazide                                             |  | 4.97   | 2.25     | 375.24 | 9.89                      | 15.29                      | -1.96                    | 27.31           |

\* According to Checkmol by Haider [9]

Table 7: Compound class analysis.

| Compound Class*                   | Pic                                                                                 | IP[eV] | Visc[cP] | FP[K]  | $\mu(Li^+)$<br>[kcal/mol] | $\mu(O_2^-)$<br>[kcal/mol] | $\mu(O_2)$<br>[kcal/mol] | pK <sub>a</sub> |
|-----------------------------------|-------------------------------------------------------------------------------------|--------|----------|--------|---------------------------|----------------------------|--------------------------|-----------------|
| Imine                             |    | 5.79   | 2.84     | 366.07 | 10.27                     | 15.39                      | -2.12                    | 26.05           |
| Cation                            |                                                                                     | 5.32   | 4.25     | 397.34 | 10.27                     | 12.44                      | -1.97                    | 31.05           |
| Azo Compound                      |    | 5.18   | 2.70     | 383.29 | 10.32                     | 16.56                      | -2.28                    | 0.00            |
| Carboxylic Acid<br>Hydrazide      |    | 5.30   | 2.69     | 387.40 | 10.33                     | 14.75                      | -1.90                    | 24.29           |
| Lactam                            |    | 6.20   | 3.12     | 395.42 | 10.42                     | 14.80                      | -1.88                    | 33.46           |
| Secondary Amine                   |    | 5.90   | 2.97     | 365.11 | 10.46                     | 15.29                      | -2.10                    | 30.69           |
| Urea                              |   | 5.71   | 2.75     | 390.00 | 10.46                     | 15.42                      | -1.98                    | 44.05           |
| Oxohetarene                       |  | 5.94   | 3.98     | 409.76 | 10.48                     | 12.96                      | -1.80                    | 31.94           |
| Secondary Aliphatic Amine         | N-Rings                                                                             | 5.94   | 2.88     | 362.58 | 10.61                     | 15.53                      | -2.11                    | 30.84           |
| Dialkylamine                      |                                                                                     |        |          |        |                           |                            |                          |                 |
| Tertiary Aliphatic Aromatic Amine | N-Rings                                                                             | 5.32   | 3.30     | 399.17 | 10.65                     | 13.76                      | -2.06                    | 33.98           |
| Alkylarylamine                    |                                                                                     |        |          |        |                           |                            |                          |                 |
| Azide                             |  | 5.28   | 2.57     | 381.02 | 10.65                     | 14.85                      | -1.98                    | 24.79           |
| Thioketone                        |  | 6.68   | 3.48     | 410.36 | 10.66                     | 13.50                      | -1.76                    | 0.00            |
| Quaternary Ammonium Salt          |  | 4.76   | 3.39     | 371.74 | 10.83                     | 14.94                      | -2.09                    | 18.18           |

\* According to Checkmol by Haider [9]

Table 7: Compound class analysis.

| Compound Class*              | Pic                                                                                               | IP[eV] | Visc[cP] | FP[K]  | $\mu(Li^+)$<br>[kcal/mol] | $\mu(O_2^-)$<br>[kcal/mol] | $\mu(O_2)$<br>[kcal/mol] | $pK_a$ |
|------------------------------|---------------------------------------------------------------------------------------------------|--------|----------|--------|---------------------------|----------------------------|--------------------------|--------|
| Tertiary<br>boxylic<br>Amide | Car-<br>Acid<br> | 6.21   | 3.02     | 391.93 | 10.84                     | 14.98                      | -1.92                    | 33.98  |

\* According to Checkmol by Haider [9]

## 8. Phosphine oxides screening results

Phosphine oxides were identified as a promising compound class, but no structure in the PubChem database was found to be better than the reference molecules (DMSO, MeIm). We therefore investigated 362 systematically generated phosphine oxides and their sulfur analogs, as well as 962 cyclic phosphine oxides. See main text for more details. Our best suggestions are listed in table 8. QSPR-estimated melting points are given as a first indication of whether compounds are liquid at room temperature, but the mean accuracy of these estimates is low and this data should thus be taken with care, especially if COSMOtherm predicts low viscosities.

Table 8:  $\mu$ -filtered Pareto-optimal candidates.

| ID    | IP[eV] | Visc[cP] | FP[K]  | $\mu(Li^+)$<br>[kcal/mol] | $\mu(O_2^-)$<br>[kcal/mol] | $\mu(O_2)$<br>[kcal/mol] | MP[°C] | $pK_a$ | Pic                                                                                   |
|-------|--------|----------|--------|---------------------------|----------------------------|--------------------------|--------|--------|---------------------------------------------------------------------------------------|
| po911 | 6.62   | 3.27     | 386.42 | 6.90                      | 10.60                      | -1.61                    | -4.0   | 24.17  |  |
| po138 | 5.92   | 4.70     | 423.24 | 7.23                      | 10.72                      | -1.59                    | 22.5   | 20.47  |  |
| po164 | 6.37   | 4.77     | 407.00 | 7.61                      | 10.41                      | -1.61                    | 4.4    | 24.90  |  |
| po110 | 6.75   | 5.78     | 372.49 | 7.83                      | 10.07                      | -1.65                    | 8.5    | 25.47  |  |

Table 8:  $\mu$ -filtered Pareto-optimal candidates.

| ID    | IP[eV] | Visc[cP] | FP[K]  | $\mu(Li^+)$<br>[kcal/mol] | $\mu(O_2^-)$<br>[kcal/mol] | $\mu(O_2)$<br>[kcal/mol] | MP[ °C] | pK <sub>a</sub> | Pic                                                                                 |
|-------|--------|----------|--------|---------------------------|----------------------------|--------------------------|---------|-----------------|-------------------------------------------------------------------------------------|
| po922 | 6.46   | 3.63     | 399.10 | 8.05                      | 10.27                      | -1.49                    | 18.4    | 29.62           |  |
| po129 | 6.73   | 4.17     | 393.85 | 8.65                      | 10.51                      | -1.62                    | 6.0     | 23.16           |  |
| po175 | 6.31   | 5.04     | 398.43 | 8.88                      | 10.07                      | -1.50                    | 24.8    | 23.16           |  |
| po177 | 7.06   | 5.07     | 457.40 | 8.97                      | 10.13                      | -1.52                    | 22.8    | 22.45           |  |
| po196 | 6.85   | 5.99     | 375.76 | 9.03                      | 9.30                       | -1.61                    | 4.3     | 23.30           |  |
| po277 | 6.50   | 5.34     | 417.80 | 9.07                      | 9.81                       | -1.46                    | 33.1    | 24.35           |  |

## 9. Heterocycles screening results

Heterocycles were identified as a promising compound class, and some structures in the PubChem database were found to be competitive to the reference molecules (DMSO, MeIm), though a trade-off between the relevant ion solubilities and viscosity could be identified. For further investigations, all small- to medium-sized aromatic N-hetero-bi/mono-cycles, all small N-hetero-mono-cycles, and all N/O/S-hetero-cycles with simple aliphatic substituents were investigated (overall about 350.000 structures). See main text for more details. From all competitive candidates we list here the 31 Pareto-optimal ones which contain only one hetero-atom species in table 9 QSPR-estimated melting points are given as a first indication of whether compounds are liquid at room temperature, but the mean accuracy of these estimates is low and this data should thus be taken with care, especially if COSMOtherm predicts low viscosities.



Table 9:  $\mu$ -filtered Pareto-optimal candidates.

| ID                                                               | IP[eV] | Visc[cP] | FP[K]  | $\mu(Li^+)$<br>[kcal/mol] | $\mu(O_2^-)$<br>[kcal/mol] | $\mu(O_2)$<br>[kcal/mol] | MP[°C] | pK <sub>a</sub> | Pic                                                                                   |
|------------------------------------------------------------------|--------|----------|--------|---------------------------|----------------------------|--------------------------|--------|-----------------|---------------------------------------------------------------------------------------|
| <b>best 'simple' N-hetero-cycles (see main text for details)</b> |        |          |        |                           |                            |                          |        |                 |                                                                                       |
| c1e29189                                                         | 6.71   | 4.27     | 448.63 | 8.26                      | 8.26                       | 10.70                    | 79.3   | 24.72           |    |
| c1e30459                                                         | 5.91   | 4.94     | 469.24 | 8.53                      | 8.53                       | 9.76                     | 63.9   | 5.21            |    |
| c1e31492                                                         | 5.74   | 3.43     | 458.09 | 7.79                      | 7.79                       | 10.81                    | 77.0   | 38.52           |    |
| c1e33518                                                         | 6.41   | 2.81     | 448.89 | 7.38                      | 7.38                       | 10.56                    | 89.5   | 34.31           |    |
| c1e33581                                                         | 5.63   | 3.71     | 440.72 | 7.32                      | 7.32                       | 9.95                     | 46.9   | 32.12           |    |
| c1e33608                                                         | 7.08   | 5.16     | 439.50 | 9.69                      | 9.69                       | 8.46                     | 73.5   | 23.34           |    |
| c1e33639                                                         | 5.45   | 3.54     | 444.78 | 7.86                      | 7.86                       | 9.99                     | 60.9   | 13.01           |   |
| c1e33648                                                         | 5.51   | 2.81     | 437.15 | 6.65                      | 6.65                       | 10.73                    | 59.0   | 28.22           |  |
| c1e33651                                                         | 7.45   | 4.25     | 445.67 | 8.76                      | 8.76                       | 9.25                     | 68.5   | 33.88           |  |
| c1e34374                                                         | 5.63   | 3.06     | 436.27 | 7.66                      | 7.66                       | 8.72                     | 56.6   | 31.39           |  |
| c1e34376                                                         | 5.78   | 2.61     | 376.91 | 9.13                      | 9.13                       | 9.64                     | 59.2   | 35.93           |  |
| c1e34388                                                         | 6.97   | 3.86     | 445.41 | 9.09                      | 9.09                       | 7.89                     | 70.6   | 33.78           |  |
| c1e78346                                                         | 6.08   | 2.68     | 414.32 | 8.79                      | 8.79                       | 10.81                    | 41.0   | 11.38           |  |
| c1e78454                                                         | 6.81   | 2.94     | 425.94 | 9.25                      | 9.25                       | 10.56                    | 79.6   | 22.26           |  |
| c1e79038                                                         | 6.69   | 2.45     | 404.66 | 8.83                      | 8.83                       | 10.29                    | 80.6   | 10.35           |  |
| c1e79088                                                         | 6.97   | 2.09     | 390.50 | 9.62                      | 9.62                       | 10.32                    | 64.4   | 8.06            |  |
| c1e79160                                                         | 6.28   | 2.35     | 392.09 | 9.71                      | 9.71                       | 9.37                     | 52.2   | 8.46            |  |
| c1e79277                                                         | 6.05   | 1.51     | 343.88 | 8.84                      | 8.84                       | 9.74                     | 3.4    | 38.28           |  |

Table 9:  $\mu$ -filtered Pareto-optimal candidates.

| ID                                                            | IP[eV] | Visc[cP] | FP[K]  | $\mu(Li^+)$<br>[kcal/mol] | $\mu(O_2^-)$<br>[kcal/mol] | $\mu(O_2)$<br>[kcal/mol] | MP[°C] | pK <sub>a</sub> | Pic                                                                                   |
|---------------------------------------------------------------|--------|----------|--------|---------------------------|----------------------------|--------------------------|--------|-----------------|---------------------------------------------------------------------------------------|
| best 'simple' N/O/S-hetero-cycles (see main text for details) |        |          |        |                           |                            |                          |        |                 |                                                                                       |
| c1f88642078                                                   | 5.63   | 3.66     | 440.70 | 7.35                      | 7.35                       | 9.95                     | 46.9   | 30.72           |    |
| c1f88642106                                                   | 5.51   | 2.80     | 437.16 | 6.64                      | 6.64                       | 10.73                    | 59.0   | 28.23           |    |
| c1f88642376                                                   | 5.63   | 3.01     | 436.30 | 7.68                      | 7.68                       | 8.79                     | 56.6   | 31.39           |    |
| c1f88652377                                                   | 5.78   | 2.61     | 376.91 | 9.11                      | 9.11                       | 9.65                     | 59.2   | 35.93           |    |
| c1f7248105                                                    | 7.08   | 5.15     | 439.53 | 9.71                      | 9.71                       | 8.46                     | 73.05  | 23.10           |    |
| c1f8850623                                                    | 6.13   | 4.12     | 386.63 | 8.49                      | 8.49                       | 10.56                    | 59.8   | 12.33           |    |
| c1f88512079                                                   | 5.78   | 3.11     | 382.02 | 8.88                      | 8.88                       | 10.68                    | 46.4   | 35.54           |    |
| c1f7249574                                                    | 7.43   | 3.76     | 445.09 | 9.09                      | 9.09                       | 7.92                     | 70.6   | 33.81           |   |
| c1f7250123                                                    | 5.46   | 3.50     | 444.60 | 7.92                      | 7.92                       | 9.98                     | 60.9   | 13.04           |  |
| c1f7267966                                                    | 6.97   | 2.08     | 390.36 | 9.64                      | 9.64                       | 10.32                    | 64.4   | 8.09            |  |
| c1f7267979                                                    | 6.66   | 2.06     | 368.84 | 9.58                      | 9.58                       | 9.98                     | 21.1   | 8.74            |  |
| c1f7287380                                                    | 4.72   | 5.62     | 402.59 | -7.02                     | -7.02                      | 10.74                    | -39.5  | 2.22            |  |
| c1f7287759                                                    | 5.15   | 5.10     | 518.14 | 8.61                      | 8.61                       | 8.88                     | -23.0  | 18.18           |  |

## 10. Final results

Finding Li-air battery electrolyte solvents better than DMSO and Melm turns out to be surprisingly hard, if indeed both  $Li^+$  and  $O_2^-$  solubilities play an important role, as suggested in recent experimental reports. The following compounds are our suggestions for experimental investigations into the optimal balance of  $Li^+/O_2^-$  solubilities with viscosity, see main text for details.

Table 10: Final results.

| ID                                  | IP[eV] | Visc[cP] | FP[K]  | $\mu(Li^+)$<br>[kcal/mol] | $\mu(O_2^-)$<br>[kcal/mol] | MP[°C] | pK <sub>a</sub> | Pic                                                                                 |
|-------------------------------------|--------|----------|--------|---------------------------|----------------------------|--------|-----------------|-------------------------------------------------------------------------------------|
| 18725001_18750000_2537              | 6.11   | 1.85     | 390.15 | 9.72                      | 13.32                      | -16.5  | 32.74           | <chem>H3C-C(=O)-N(-CH3)-CH2-CH2-O-CH3</chem>                                        |
| 00075001_00100000_5084 <sup>1</sup> | 6.04   | 1.80     | 353.44 | 8.52                      | 10.93                      | 3.2    | 38.06           |  |
| 11125001_11150000_287               | 6.42   | 1.74     | 393.28 | 7.30                      | 12.49                      | -17.3  | 30.38           |  |
| 00075001_00100000_6354              | 5.19   | 1.76     | 377.63 | 6.25                      | 13.98                      | -11.6  | 31.33           |  |
| 18700001_18725000_7879              | 5.24   | 1.28     | 320.59 | 5.97                      | 16.01                      | -4.8   | 33.68           |  |
| 20475001_20500000_3853              | 6.88   | 1.93     | 362.27 | 4.17                      | 13.16                      | 4.9    | 35.54           |  |

<sup>1</sup> DMSO has the lowest  $\mu(O_2^-)$  in the 8-9 kcal/mol interval for  $\mu(Li^+)$ ; 00075001\_00100000\_5084 is listed as alternative.

## 11. Alternative results

Our approach and the computed data is of value for the development of Li-air battery electrolytes, even if the assumed hypothesis about the importance of the different ion solubilities turns out to be wrong, because our database can easily be re-evaluated with respect to other criteria. As an example we give here a list of the most promising motifs for the case that the solubility of the negative species is actually of lesser importance, i.e. looking for compounds with a viscosity lower than 2 cP in combination with a Lithium cation chemical potential below 10 kcal/mol, as well as pK<sub>a</sub>s higher than 25 and melting points lower than 10K. Very different compounds are found in this analysis in comparison to the previous ones, now with an emphasis on amide and amine motifs, thus nicely illustrating how important the choice of selection criteria (and therefore input from experiment) is.

Table 11: Alternative Results: Representative with the lowest  $\mu(Li^+)$  for each motif.

| Motif                 | IP[eV] | Visc[cP] | FP[K]  | $\mu(Li^+)$<br>[kcal/mol] | $\mu(O_2^-)$<br>[kcal/mol] | MP[°C] | $pK_a$ | Pics |
|-----------------------|--------|----------|--------|---------------------------|----------------------------|--------|--------|------|
| Phosphine Oxide       | 6.88   | 1.93     | 362.27 | 4.17                      | 13.16                      | 4.90   | 35.54  |      |
| Tertiary Amine, Amide | 5.19   | 1.76     | 377.63 | 6.25                      | 13.98                      | -11.60 | 31.33  |      |
| Tertiary Diamine      | 4.97   | 1.24     | 305.59 | 7.10                      | 16.60                      | 9.00   | 47.98  |      |
| Amide                 | 6.26   | 1.52     | 364.29 | 7.89                      | 14.50                      | 4.60   | 32.69  |      |
| Tertiary Amine        | 4.85   | 1.88     | 332.90 | 7.94                      | 18.37                      | 5.10   | 49.95  |      |
| Urea                  | 5.97   | 0.90     | 327.42 | 8.51                      | 15.33                      | -7.50  | 44.06  |      |
| Aromatic              | 6.04   | 1.80     | 353.44 | 8.52                      | 10.93                      | 3.20   | 38.06  |      |
| Silane, Amide         | 5.70   | 1.98     | 335.57 | 9.02                      | 15.21                      | 3.80   | 32.45  |      |
| Lactam                | 6.35   | 1.14     | 342.03 | 9.08                      | 14.07                      | -16.50 | 32.52  |      |
| Tertiary Amine, Ester | 5.24   | 1.64     | 331.27 | 9.24                      | 15.11                      | -1.40  | 28.09  |      |

## References

- [1] L. Johnson, C. Li, Z. Liu, Y. Chen, S. A. Freunberger, P. C. Ashok, B. B. Praveen, K. Dholakia, J.-M. Tarascon, P. G. Bruce, *Nature chemistry* **2014**, *6*, 1091–1099.
- [2] N. B. Aetukuri, B. D. McCloskey, J. M. García, L. E. Krupp, V. Viswanathan, A. C. Luntz, *Nature chemistry* **2014**, *7*, 50-56.
- [3] F. Eckert, A. Klamt, *Version C3.0* **2014**, *1*,.
- [4] V. S. Bryantsev, J. Uddin, V. Giordani, W. Walker, D. Addison, G. V. Chase, *Journal of The Electrochemical Society* **2013**, *160*, A160-A171.
- [5] V. S. Bryantsev, M. Blanco, *The Journal of Physical Chemistry Letters* **2011**, *2*, 379-383.
- [6] V. S. Bryantsev, *Chemical Physics Letters* **2013**, *558*, 42 - 47.
- [7] A. Khetan, H. Pitsch, V. Viswanathan, *The Journal of Physical Chemistry Letters* **2014**, *5*, 1318-1323.
- [8] A. Khetan, H. Pitsch, V. Viswanathan, *The Journal of Physical Chemistry Letters* **2014**, *5*, 2419-2424.
- [9] N. Haider, *Molecules* **2010**, *15*, 5079–5092.
